# Supplementary material
Source: Springer Nature journal article supplement (https://www.springermedizin.de/resource/supplementary/12943_2010_743_MOESM4_ESM.pdf/9554718)
Supplement: MOESM4 [file 9554718]

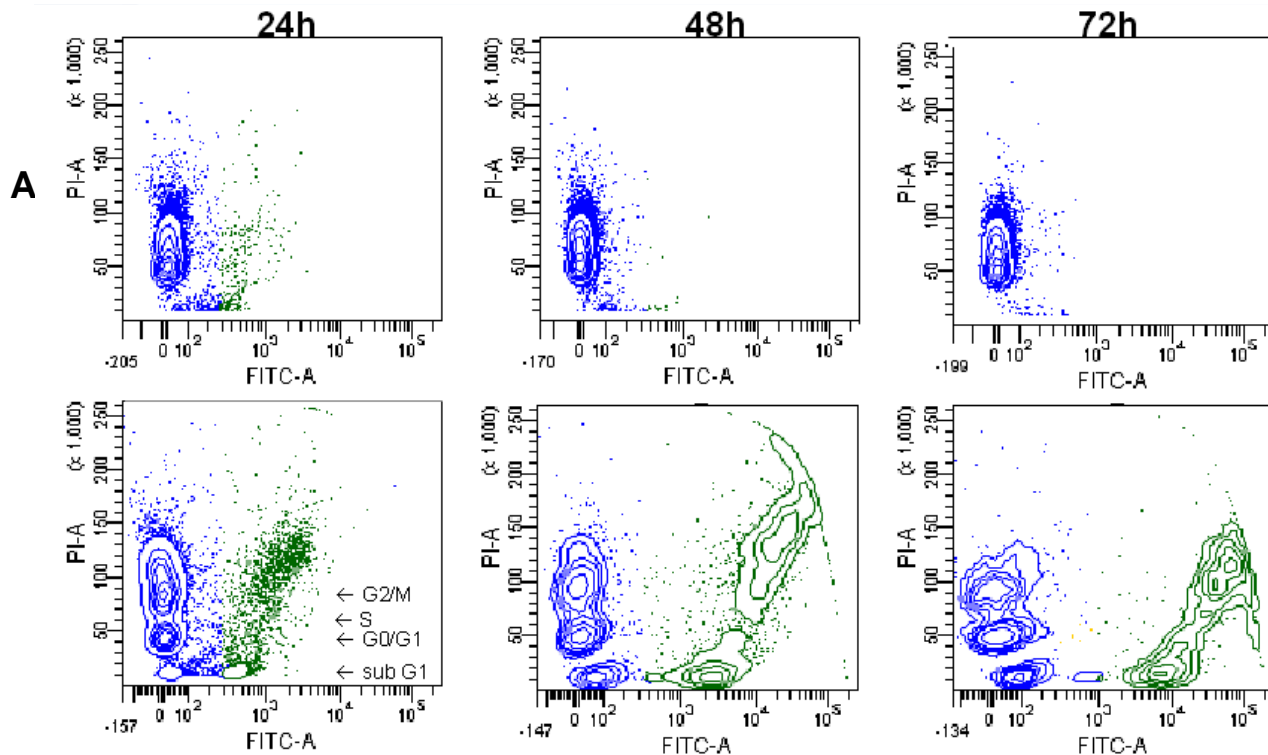

**B**

|                              | Sub G1 | G0/G1 | S    | G2/M |
|------------------------------|--------|-------|------|------|
| CTR 24h TdT +                | 2.22   | 0.46  | 0.15 | 0.52 |
| 20 $\mu$ (M) + 260 $\mu$ (V) | 2.93   | 0.64  | 0.16 | 0.93 |
| 30 $\mu$ (M) + 390 $\mu$ (V) | 4.12   | 1.33  | 0.42 | 2.54 |
| 40 $\mu$ (M) + 520 $\mu$ (V) | 5.46   | 1.28  | 0.34 | 5.67 |

|                              | Sub G1 | G0/G1 | S    | G2/M  |
|------------------------------|--------|-------|------|-------|
| CTR 48h TdT +                | 0.93   | 0.38  | 0.27 | 0.63  |
| 20 $\mu$ (M) + 260 $\mu$ (V) | 1.56   | 0.58  | 0.37 | 1.92  |
| 30 $\mu$ (M) + 390 $\mu$ (V) | 5.62   | 1.93  | 0.69 | 9.35  |
| 40 $\mu$ (M) + 520 $\mu$ (V) | 16.47  | 3.5   | 0.88 | 22.61 |

|                              | Sub G1 | G0/G1 | S    | G2/M  |
|------------------------------|--------|-------|------|-------|
| CTR 72h TdT +                | 0.55   | 0.53  | 0.21 | 0.47  |
| 20 $\mu$ (M) + 260 $\mu$ (V) | 1.59   | 1.49  | 0.71 | 2.6   |
| 30 $\mu$ (M) + 390 $\mu$ (V) | 7.61   | 3.31  | 1.23 | 16.56 |
| 40 $\mu$ (M) + 520 $\mu$ (V) | 19.1   | 7.51  | 2.04 | 22.68 |

\* $\mu$ M  $\mu$ pM
